22 <sup>9</sup>Current Affiliation: Department of Pathology and Immunology, Washington University in  
23 St. Louis School of Medicine, St. Louis, MO, 63110, USA.

24

25

26 #Address correspondence to Reed F. Johnson, [johnsonreed@niaid.nih.gov](mailto:johnsonreed@niaid.nih.gov)

27 \*Present address: One MedImmune Way, Gaithersburg, Maryland, USA

28 **ABSTRACT: 225/250**

29 **ARTICLE: 4729/5000**

30 **ABSTRACT** Simian hemorrhagic fever virus (SHFV) causes a fulminant and typically  
31 lethal viral hemorrhagic fever (VHF) in macaques (Cercopithecinae: *Macaca* spp.) but  
32 causes subclinical infections in patas monkeys (Cercopithecinae: *Erythrocebus patas*).  
33 This difference in disease course offers a unique opportunity to compare host-  
34 responses to infection by a VHF-causing virus in biologically similar susceptible and  
35 refractory animals. Patas and rhesus monkeys were inoculated side-by-side with SHFV.  
36 In contrast to the severe disease observed in rhesus monkeys, patas monkeys  
37 developed a limited clinical disease characterized by changes in complete blood counts,  
38 serum chemistries, and development of lymphadenopathy. Viremia was measurable 2  
39 days after exposure and its duration varied by species. Infectious virus was detected in  
40 terminal tissues of both patas and rhesus monkeys. Varying degrees of overlap in  
41 changes in serum concentrations of IFN- $\gamma$ , MCP-1, and IL-6 were observed between  
42 patas and rhesus monkeys, suggesting the presence of common and species-specific

43 cytokine responses to infection. Similarly, quantitative immunohistochemistry of terminal  
44 livers and whole blood flow cytometry revealed varying degrees of overlap in changes in  
45 macrophages, natural killer cells, and T-cells. The unexpected degree of overlap in  
46 host-response suggests that relatively small subsets of a host's response to infection  
47 may be responsible for driving pathogenesis that results in a hemorrhagic fever.  
48 Furthermore, comparative SHFV infection in patas and rhesus monkeys offers an  
49 experimental model to characterize host-response mechanisms associated with viral  
50 hemorrhagic fever and evaluate pan-viral hemorrhagic fever countermeasures.

51 **IMPORTANCE** Host-response mechanisms involved in pathogenesis of VHFs remain  
52 poorly understood. An underlying challenge is separating beneficial, inconsequential,  
53 and detrimental host-responses during infection. The comparison of host-responses to  
54 infection with the same virus in biologically similar animals that have drastically different  
55 disease manifestations allows for the identification of pathogenic mechanisms. SHFV, a  
56 surrogate virus for human VHF-causing viruses likely causes subclinical infection in  
57 African monkeys such as patas monkeys but can cause severe disease in Asian  
58 macaque monkeys. Data from the accompanying article by Buechler *et al.* support that  
59 infection of macaques and baboons with non-SHFV simarteviruses can establish  
60 persistent or long-term subclinical infections. Baboons, macaques, and patas monkeys  
61 are relatively closely taxonomically related (Cercopithecidae: Cercopithecinae) and  
62 therefore offer a unique opportunity to dissect how host-response differences determine  
63 disease outcome in VHFs.

64 **KEYWORDS** *Arteriviridae*, arterivirus, host-response, macaque, patas monkey,  
65 pathogenesis, SHFV, simartevirus, simian hemorrhagic fever, VHF, viral hemorrhagic  
66 fever

67

## 68 **INTRODUCTION**

69 Viral hemorrhagic fevers (VHFs) are primarily caused by single-stranded RNA viruses  
70 (1). VHF is a broadly defined syndrome: fever, hepatic and renal complications, large  
71 increases in proinflammatory cytokines and coagulopathy are common features (2, 3).  
72 Simian hemorrhagic fever virus (SHFV) is a positive-sense, single-stranded RNA virus  
73 classified in the family *Arteriviridae*, which also includes equine arteritis virus and  
74 porcine reproductive and respiratory syndrome viruses 1 and 2 (4, 5). In addition to  
75 SHFV, several other simian arteriviruses (genus *Simartevirus*) have been identified (6-  
76 8). Among simarteviruses, SHFV, simian hemorrhagic encephalitis virus (SHEV), and  
77 Pebab virus (PBJV) are known to cause severe disease in Asian macaques of various  
78 species (9). Kibale red colobus virus 1 (KRCV-1) was found to cause a self-limiting  
79 disease in crab-eating macaques (10). It is not known whether the other identified  
80 simarteviruses infect or cause disease in macaques or their natural hosts. Here, and in  
81 combination with accompanying article by Buechler *et al.*, we examine infection of  
82 natural hosts (patas monkeys and baboons) with simarteviruses, and compare disease  
83 course of these simarteviruses in macaque monkeys.

84 SHFV was discovered during a VHF outbreak in National Institutes of Health (NIH)  
85 animal facilities in the United States in 1964 (11, 12). Transmission during the NIH

86 SHFV outbreak is thought to have occurred through tattooing needles used on both  
87 macaques and co-housed African primates ([12](#)). The virus is highly virulent in rhesus  
88 monkeys (*Macaca mulatta*), crab-eating macaques (*Macaca fascicularis*), stump-tailed  
89 macaques (*Macaca arctoides*), and Japanese macaques (*Macaca fuscata*), but SHFV  
90 causes little to no disease in African primates such as patas monkeys or baboons ([11](#),  
91 [13](#), [14](#)). SHFV infection in macaques mirrors aspects of human VHFs, such as Ebola  
92 virus disease, by inducing fever, edema, coagulopathy, hepatocellular degeneration and  
93 necrosis, and elevated inflammatory cytokine concentrations ([13-15](#)). Like all VHFs,  
94 simian hemorrhagic fever (SHF) is thought to be driven by a dysregulated host-  
95 response leading to a dysregulated immune response and poor viral clearance ([13](#), [14](#),  
96 [16](#)).

97 Studying SHFV offers a unique opportunity to compare infection and associated  
98 responses in refractory and highly susceptible primates that are biologically similar to  
99 each other and to humans. Some hemorrhagic fever-causing viruses naturally infect  
100 non-primate mammals that may serve as hosts or reservoirs. For instance, Marburg  
101 virus (*Filoviridae: Marburgvirus*, MARV) and Ravn virus (*Filoviridae: Marburgvirus*,  
102 RAVV) naturally circulate in Egyptian rousettes (*Rousettus aegyptiacus*), in which they  
103 do not cause disease, whereas these viruses cause frequently lethal disease  
104 experimentally in primates and naturally in humans ([17](#)). Similarly, arenaviruses  
105 associated with human VHFs, such as Machupo virus and Lassa virus (*Arenaviridae:*  
106 *Mammarenavirus*), subclinically infect distinct rodent reservoir hosts ([18](#), [19](#)).  
107 Comparing the response to infection between refractory hosts, preferably the reservoirs  
108 themselves, and susceptible hosts may offer significant insight into responses involved

109 in VHF pathogenesis. For most hemorrhagic fever-causing viruses, comparisons  
110 between refractory and susceptible animals during infection is confounded by large  
111 biological differences. For example, work with pathogenic mammarenaviruses has  
112 demonstrated that mechanisms present in murine hosts, even susceptible ones, are  
113 fundamentally different than those of primates (20). Unlike these examples, SHFV  
114 infects biologically similar refractory and susceptible animals and may provide a path  
115 towards meaningful interspecies comparisons of responses to hemorrhagic fever-  
116 causing virus infection.

117 The goal of this work was to compare host-responses in biologically similar  
118 nonhuman primates, patas (refractory) monkeys and rhesus (susceptible) monkeys,  
119 infected with SHFV to identify factors associated with differential outcomes to infection.  
120 The findings are the first in-depth characterization of SHFV infection in patas monkeys  
121 and confirm that patas monkeys are largely unaffected by SHFV infection. Our work  
122 demonstrates that, although patas and rhesus monkeys develop drastically different  
123 diseases, the host-responses to infection overlap, and suggest that VHF pathogenesis  
124 may be driven by a relatively small subset of the overall host-response to infection.

125

## 126 **RESULTS**

### 127 **Simian hemorrhagic fever virus (SHFV) infection results in mild clinical disease.**

128 Twelve monkeys were grouped by species into SHFV-inoculated and PBS inoculated  
129 groups, n=3 per. Inoculations were 1-ml intramuscular injections in the right quadriceps.

130 The 3 SHFV-inoculated patas monkeys developed axillary and inguinal

131 lymphadenopathy starting on day 10 post-inoculation (PI) that persisted until the  
132 conclusion of the experiment at 21 days PI. The 3 SHFV-inoculated rhesus monkeys  
133 developed severe disease. Two subjects (“non-survivors”) met clinical endpoint criteria  
134 and were euthanized on days 8 and 11 post-inoculation. The third subject (“survivor”)  
135 survived until the conclusion of the experiment (day 20 PE). Signs of disease were first  
136 detectable on day 4 PI SHFV-inoculated rhesus monkeys developed a range of clinical  
137 signs and included: gingival bleeding (1/3 subjects), inguinal lymphadenopathy (1/3),  
138 and axillary lymphadenopathy (2/3). All SHFV-inoculated rhesus monkeys developed  
139 petechial rashes and axial and inguinal lymphadenopathy by their respective endpoints.  
140 All 3 SHFV-inoculated rhesus monkeys developed tremors and motor dysfunction by  
141 day 6 PI that remained until each subject’s respective endpoint. The non-surviving  
142 rhesus monkeys developed facial edema that began on day 8 PI that persisted to their  
143 respective endpoints. The surviving SHFV-inoculated rhesus monkey developed facial  
144 edema that began on day 12 PI and resolved by day 16 PI. All mock-inoculated rhesus  
145 appeared clinically normal and displayed no outward signs of disease throughout the  
146 experiment.

147 **SHFV infection results in clinical pathology changes in patas monkeys.** In  
148 SHFV-inoculated patas monkeys, alanine aminotransferase (ALT), alkaline  
149 phosphatase (ALP) and aspartate aminotransferase (AST) concentrations were  
150 elevated on day 4 PI and remained above baseline until the end of the experiment (Fig  
151 1A-C).  $\gamma$ -glutamyl transferase (GGT) concentrations remained normal in all SHFV-  
152 inoculated patas monkeys (Fig 1D). SHFV-inoculated rhesus monkeys showed similar  
153 trends except that GGT concentrations rose starting on day 4 PI. ALP, AST, and GGT

154 concentrations remained elevated in the surviving SHFV-inoculated rhesus monkey until  
155 the conclusion of the experiment, whereas ALT returned to baseline concentrations.  
156 Although changes in serum chemistries were observed in all SHFV-inoculated subjects,  
157 values did not reach concentrations suggestive of a severe clinical disease. All subjects  
158 experienced decreases in albumin concentration coinciding with globulin concentration  
159 increases (Fig 1F) on day 8 and day 4 PI in SHFV-inoculated patas and rhesus  
160 monkeys, respectively. Reticulocyte counts decreased in both SHFV-inoculated patas  
161 and rhesus monkeys: on day 6 PI in patas monkeys and on day 4 PI in rhesus monkeys  
162 (Fig 1E), but did not drop below the normal range. Hematocrit (HCT) remained normal  
163 in all subjects except for the surviving SHFV-inoculated rhesus where HCT decreased  
164 starting on day 10 PI with anemia persisting to study end (Fig 1G). Albumin  
165 concentrations (Fig 1H) began decreasing in SHFV inoculated patas monkeys on day 6  
166 PI to day 8 PI after which concentrations remained depressed till the conclusion of the  
167 study. In SHFV-inoculated rhesus monkeys, albumin concentrations began decreasing  
168 on day 2 and continued to decrease in all subjects till their respective endpoints. No  
169 significant changes in serum chemistry were observed in mock-inoculated patas and  
170 rhesus monkeys.

171 Complete blood counts revealed minor decreases in lymphocyte numbers early in all  
172 SHFV-inoculated patas and rhesus monkeys, followed by a return to baseline counts at  
173 day 8 PI (Fig 1I). Lymphocyte counts increased in the surviving rhesus, but the  
174 mechanism is not known at this time and may represent further maturation of the  
175 immune response. Monocyte counts decreased slightly in all SHFV-inoculated patas  
176 and rhesus monkeys on day 2 PI before increasing by day 6 PI. After day 6 PI



177 monocyte counts (Fig 1J) in SHFV-inoculated patas monkeys returned to baseline by  
178 day 15 followed by a second increase in 2/3 subjects. Unlike the patas monkeys,  
179 monocyte counts in SHFV-inoculated rhesus monkeys continued to increase until each  
180 subject's endpoint. No significant changes were observed in complete blood counts in  
181 any mock-inoculated subjects.

182 **SHFV infection causes mild pathology in patas monkeys.** Gross examination of  
183 SHFV-inoculated patas monkeys during necropsy confirmed peripheral  
184 lymphadenopathy in all three subjects, but there were no other remarkable findings.  
185 Non-surviving SHFV-inoculated rhesus monkeys had marked hepatosplenomegaly:  
186 hepatic tissues were friable and firm. Moderate peripheral and visceral  
187 lymphadenopathy was found in both non-surviving rhesus monkeys, whereas moderate  
188 peripheral lymphadenopathy was the only significant finding in the surviving rhesus  
189 monkey. The kidneys of one non-surviving SHFV-inoculated rhesus monkey contained  
190 multiple infarctions with severe renal hemorrhage and necrosis. No significant gross  
191 lesions were observed in either mock-inoculated group.

192 Histopathological examination of the spleen in SHFV-inoculated patas monkeys  
193 revealed abundant plasma cells in one subject. The spleens of the 2 remaining SHFV-  
194 inoculated patas monkeys were within normal limits. The livers of two SHFV-inoculated  
195 patas monkeys had minimal inflammatory changes, whereas that of the third patas  
196 monkey was within normal limits. Hyperplasia was evident in the inguinal lymph nodes  
197 of 1 SHFV-inoculated patas monkey. The spleens of SHFV-inoculated rhesus monkeys  
198 were different in each subject: in the two non-survivors, one was congested, whereas  
199 fibrin deposition was evident in the other. The spleen of the surviving subject exhibited

200 changes that were consistent with reactive lymphoid hyperplasia, characterized by  
201 diffuse expansion and proliferation of B-cells at the margins of each follicle. Each of the  
202 livers of SHFV-inoculated rhesus monkeys were also histologically different. In the  
203 survivor, perivascular inflammation with multifocal areas of necrosis were evident. The  
204 major finding in the liver of one non-survivor was vacuolated hepatocytes, whereas rare  
205 thrombi were the major observation in the remaining non-survivor. Hyperplasia was  
206 present in inguinal lymph nodes of all three SHFV-inoculated rhesus monkeys. Tissues  
207 of all mock-inoculated subjects were normal apart from vascular congestion in 2 patas  
208 monkey spleens. While all three SHFV-inoculated rhesus monkeys displayed  
209 neurological signs, on histopathological examination CNS tissues did not reveal any  
210 evidence of vasculitis or other changes that would suggest encephalitis. CNS tissues of  
211 all mock-inoculated animals and SHFV-inoculated patas monkeys were found to be  
212 within normal histologic limits. Upon histopathological examination kidneys of all  
213 subjects appeared to be within normal histologic limits.

214 Immunohistochemical staining used to detect ionized calcium-binding adaptor 1 (Iba-  
215 1)-expressing macrophages revealed morphologically-normal macrophages in the livers  
216 of all 3 SHFV-inoculated patas monkeys. In contrast, the livers of all 3 SHFV-inoculated  
217 rhesus monkeys contained macrophages that were often rounded and contained a  
218 diffusely vacuolated cytoplasm (Fig 2A, inset). These changes in macrophage  
219 morphology were in direct contrast to these cells in infected patas monkeys which often  
220 exhibited a more stellate shape and cytoplasm that was diffusely dark brown when  
221 evaluated immunohistochemically. Similar findings were seen in the inguinal lymph  
222 nodes and spleen of SHFV-inoculated patas and rhesus monkeys, although rounded

223 macrophages were detected in the spleen of one SHFV-inoculated patas monkey and  
224 inguinal lymph nodes of a second SHFV-inoculated patas monkey. Macrophages  
225 appeared morphologically normal in all mock-inoculated subjects.

226 **Viremia is sustained in SHFV-infected patas monkeys.** SHFV-inoculated patas  
227 and rhesus monkeys became viremic on day 2 PI (Fig 3A). The average peak titers in  
228 patas and rhesus monkeys were 6.75 (range 6.41–6.96) and 7.08 (range 6.79–7.36)  
229  $\log_{10}$  viral RNA (vRNA) copies per ml, respectively. Viremia peaked on day 4 PI in patas  
230 monkeys and was detectable in all three subjects for the remainder of the experiment,  
231 except for days 15 and 19 PI where viremia was below the limit of detection in two  
232 subjects. Terminal viremia in SHFV-inoculated patas monkeys was 3.42 (range 2.51–  
233 4.43)  $\log_{10}$  vRNA copies per ml. In SHFV-inoculated rhesus monkeys, viremia peaked  
234 between days 5 and 12 PI. Terminal viremia in SHFV-inoculated rhesus was 6.30, 7.36  
235 and 4.17  $\log_{10}$  vRNA copies per mL in the two non-survivors and single survivor,  
236 respectively.

237 SHFV was detected by plaque assay in the axillary lymph node (n=1), spleen (n=1),  
238 and jejunum (n=1) of 2 SHFV-inoculated patas monkeys (Fig 3B). The highest titer was  
239 3.36  $\log_{10}$  PFU/mg in the jejunum of the SHFV-inoculated patas with the highest  
240 terminal viremia. In the 2 non-surviving SHFV-inoculated rhesus monkeys, SHFV was  
241 found in axillary and inguinal lymph nodes (n=2 and 1, respectively), spleen (n=2), liver  
242 (n=2), jejunum (n=1), thyroid (n=2), brain-stem (n=1), and kidney (n=2). Only the kidney  
243 of the surviving SHFV-inoculated rhesus monkey contained SHFV, and its titer (2.53  
244  $\log_{10}$  PFU/mg) was similar to those of the two non-survivors (2.82 and 5.35  $\log_{10}$

245 PFU/mg, respectively). The highest tissue titer in SHFV-inoculated rhesus monkeys was  
246 4.27 log<sub>10</sub> PFU/mg in axillary lymph nodes.

247 Bone marrow, cerebella, jejuna, axial and inguinal lymph nodes, kidneys, and  
248 thyroids were assessed for evidence of SHFV infection by TEM. DMVs and apparently  
249 mature virions were found in the jejunum of the SHFV-inoculated patas monkey with the  
250 highest terminal viremia (Fig 3C and D). ISH for SHFV vRNA was performed to assess  
251 the livers, spleens, brainstems, cerebella, and femoral bone marrow of SHFV-inoculated  
252 subjects for signs of SHFV replication. The liver of 2 SHFV-inoculated patas monkeys  
253 and, rarely, the spleen of the third was positive for SHFV vRNA (Fig 2B) using  
254 RNAScope. The femoral bone marrow of the patas monkey with the highest terminal  
255 titer was positive for vRNA. vRNA was detected by ISH in the cerebellum, brain-stem,  
256 spleen, and liver of all SHFV-inoculated rhesus monkeys. vRNA was detected in  
257 femoral bone marrow of all three SHFV-inoculated rhesus monkeys. Morphologically,  
258 ISH data support that monocytes and endothelial cells are sites of SHFV infection in  
259 examined livers, spleens, brainstems, and cerebella of both SHFV-inoculated patas and  
260 rhesus monkeys. In all tissues, cells positive for SHFV vRNA (RNAScope) were  
261 morphologically consistent with macrophage-lineage cells; in each of the tissues  
262 evaluated these cells were present in fairly low numbers.

263 **SHFV infection of patas and rhesus monkeys elicit strong and overlapping**  
264 **immune responses.** Quantitative immunohistochemistry (qIHC) revealed statistically  
265 significant (t-test, p<0.05) changes in inflammatory cell populations in livers of SHFV-  
266 inoculated monkeys (Fig 4A). On average, SHFV-inoculated patas monkeys had livers  
267 with increased CD3 and Iba1 signals when compared to uninfected patas monkeys.

268 CD8 signals were increased in the liver of SHFV-inoculated patas monkeys when  
269 compared to uninfected patas monkeys but did not reach significance ( $p=0.06$ ). CD8  
270 and NKG2A signals were increased in SHFV-inoculated rhesus monkeys compared to  
271 uninfected controls. In the spleen, significant changes were seen in major  
272 histocompatibility complex class-1 (MHC1) and Iba1 signals between SHFV-inoculated  
273 and mock-inoculated patas monkeys (Fig 4B). No significant differences in cell  
274 concentrations were observed for CD3, CD8, and NKG2A in the splenic tissue of  
275 infected and uninfected patas monkeys. No significant changes were seen between  
276 SHFV-inoculated and mock-inoculated rhesus monkey spleens for any of the markers  
277 quantified.

278 Interferon gamma (IFN- $\gamma$ ) concentrations in all SHFV-inoculated patas monkeys  
279 were elevated on day 2 PI compared to the pre-exposure mean concentration (group  
280 mean fold change (GMFC): 55.52, group mean concentration (GMC): 87.24 pg/ml) (Fig  
281 4A). Later IFN- $\gamma$  concentrations decreased to baseline in 2 SHFV-inoculated patas  
282 monkeys, whereas the concentration of the third patas monkey remained elevated  
283 throughout the experiment with a second peak in concentration at 12 days PI (group  
284 mean fold change (GMFC): 29.75; GMC: 43.11 pg/ml). The two non-surviving SHFV-  
285 inoculated rhesus monkeys had peak concentrations of similar magnitudes 2 days PI  
286 (GMFC: 14.57; GMC: 83.09 pg/ml) and all three subjects had increased concentrations  
287 by day 6 PI (GMFC: 20.58; GMC: 99.93 pg/ml).

288 Mean monocyte chemoattractant protein 1 (MCP-1) concentrations peaked at day 2  
289 PI in all SHFV-inoculated patas monkeys and the two non-surviving rhesus monkeys  
290 (28.61 and 38.80 group MFC, respectively; 11,477.68 and 8,266.47 pg/ml GMC,

291 respectively) (Fig 4B). All SHFV-inoculated rhesus monkeys had a second MCP-1  
292 concentration peak at day 8 PI (group MFC: 50.68; GMC: 5,617.24 pg/ml).

293 SHFV-inoculated patas monkeys had mild increases in interleukin 6 (IL-6)  
294 concentrations in comparison to their mock counterparts (3.93 and 1.07 mean of  
295 individual PI fold changes respectively, 11.04 and 3.97 pg/ml GMC, respectively).  
296 SHFV-inoculated rhesus monkeys had increased IL-6 concentrations 2 days PI (group  
297 MFC: 17.34; GMC: 55.02 pg/ml) and the two non-survivors on their respective terminal  
298 days (419.82-fold change, 2,637.57 pg/ml non-survivor group mean concentration) (Fig  
299 4E). The remaining analytes were below the limit of detection and were not considered  
300 for further analysis.

301 Flow cytometry of whole blood revealed increased numbers of circulating natural  
302 killer (NK) cells in SHFV-inoculated patas monkeys on days 12 and 19 PI (Fig 5A). In  
303 contrast, SHFV-inoculated rhesus monkeys had a single, larger, increase in circulating  
304 NK cells on day 8 PI. Changes in Ki67<sup>+</sup> NK cells in SHFV-inoculated patas monkeys  
305 were more variable, with one patas monkey reaching peak numbers at 2 days PI and  
306 the other two patas monkeys reaching peak numbers of day 8 PI (Fig 5B). Increased Ki-  
307 67<sup>+</sup> numbers in the surviving rhesus monkey returned to baseline by the conclusion of  
308 the experiment.

309 Circulating CD14<sup>+</sup> monocytes were decreased in SHFV-inoculated patas monkeys at  
310 day 2 PI prior to returning to baseline counts, whereas counts in SHFV-inoculated  
311 rhesus monkeys appeared unchanged throughout the experiment (Fig 5C). SHFV-  
312 inoculated patas and rhesus monkeys had decreased numbers of CD14<sup>+</sup> CD163<sup>+</sup>  
313 macrophages (Fig 5D) starting at day 2 PI that remained until each subject's respective

314 endpoint. Both SHFV-inoculated patas and rhesus monkeys had declines in circulating  
315 CD4<sup>+</sup> and CD8<sup>+</sup> T-cell numbers starting on day 2 PI, but counts recovered by day 10 PI  
316 (data not shown). Numbers of PD-1<sup>+</sup> CD8<sup>+</sup> T-cells began to increase in both SHFV-  
317 inoculated patas and rhesus monkeys on day 10 and 8 PI, respectively, and remained  
318 elevated until the conclusion of the experiment (Fig 6E). Ki-67<sup>+</sup> CD8<sup>+</sup> T-cell numbers  
319 were elevated on day 2 PI before decreasing to baseline counts. A second, larger, peak  
320 in Ki-67<sup>+</sup> CD8<sup>+</sup> T-cell numbers was seen on day 8 PI in both SHFV-inoculated patas and  
321 rhesus monkeys, followed again by a return to baseline counts (Fig 5F).

322 IgG antibody responses were detected by enzyme-linked immunosorbent assay  
323 (ELISA) in all three SHFV-inoculated patas monkeys and two of the three (the survivor  
324 and one non-survivor) SHFV-inoculated rhesus monkeys (Fig 6). Two SHFV-inoculated  
325 patas monkeys had detectable anti-SHFV antibodies on day 10 PI and the third on day  
326 15 PI. The two SHFV-inoculated rhesus monkeys with a response began responding on  
327 day 10 PI. Response magnitude continued to increase in all responding subjects till their  
328 respective endpoints. Anti-SHFV antibodies were not detected in mock-inoculated  
329 subjects at any time.

## 330 **DISCUSSION**

331 The goal of this study was to characterize SHFV infection of patas monkeys in  
332 comparison to rhesus monkeys to assess the usefulness of comparing biologically  
333 similar refractory and susceptible primates of different species in hemorrhagic fever  
334 virus infection. This is the first report of successful experimental SHFV infection of patas  
335 monkeys and further characterizes SHFV in rhesus monkeys.

336 Our data demonstrate that SHFV can replicate to high titers in patas monkeys  
337 without causing significant disease. Consistent with previously obtained data derived  
338 from experimentally SHFV-infected macaques ([10](#), [13](#), [14](#)), ISH and electron  
339 microscopy of infected tissues indicate that tissue-resident macrophages and  
340 endothelial cells are likely the main targets of SHFV in patas monkeys. Although not  
341 definitive, our findings indicate that SHFV may replicate in the same or similar cell  
342 populations in both patas and rhesus monkeys. Additional experiments are required to  
343 confirm the tissue distribution of SHFV and characterize the infected cell types over the  
344 course of the infection.

345 The immune response of SHFV-inoculated patas monkeys is similar to that of  
346 SHFV-inoculated rhesus monkeys and includes initial lymphopenia and monocytopenia,  
347 elevated IFN- $\gamma$  and MCP-1 concentrations, and changes in circulating macrophage, NK,  
348 and T-cell populations. Patas monkeys did not react with IL-6 concentration increases to  
349 SHFV infection, whereas increased IL-6 concentrations in SHFV infected rhesus were  
350 observed in this experiment and have been previously reported ([10](#), [13](#), [14](#)). This  
351 difference is of particular interest as IL-6 has been associated with non-survival in  
352 SHFV-infected rhesus monkeys, and because decreased concentrations of IL-6 were  
353 seen in *in vitro* infection of monocyte-derived macrophages and dendritic cells from  
354 baboons ([13](#), [15](#)). Given the potential role of IL-6 in human VHF, our model offers an  
355 opportunity to explore the potential of therapies, such as neutralizing antibodies, aimed  
356 at modulating IL-6 responses during infection.

357 IFN- $\gamma$  may be a more challenging target given that concentrations fluctuated in both  
358 patas and rhesus monkeys and that observed differences were largely temporal. Future



359 experiments are required to determine whether the difference in IFN- $\gamma$  responses  
360 between patas and rhesus monkeys is indicative of functional differences of NK or T-  
361 cells during SHFV infection. IFN- $\gamma$  has been implicated in conflicting roles in other VHF-  
362 causing virus infections, such as filovirus and mammarenavirus infections, ranging from  
363 detrimental to protective ([21-26](#)). If differences exist between activation states of NK or  
364 T-cells between animals of different species, further characterization of relevant  
365 cytokine concentrations and cell-cell interactions is warranted. Given the temporal  
366 nature of the differences in IFN- $\gamma$ , a more prudent therapeutic approach may be to  
367 directly stimulate or inhibit dysfunctional cell-types through supplementing factors or  
368 inhibiting signaling.

369 Livers of SHFV-inoculated patas monkeys had increased CD3 and Iba1 signals  
370 whereas those of SHFV-inoculated rhesus monkeys had elevated CD8 and NKG2A  
371 signals. Increases in CD8 and NKG2A signals in the absence of an increase in CD3  
372 signal suggests that SHFV infection leads to an increase in infiltrating NK cells in rhesus  
373 monkeys ([27](#)). Indeed, the numbers of circulating NK cells were elevated at day 8 PI.  
374 Although there were clear quantitative differences in tissue and circulating NK cells  
375 between SHFV-infected patas and rhesus monkeys, all animals were affected by similar  
376 changes in circulating Ki-67<sup>+</sup> NK cell numbers. The data suggest that a potent type 1  
377 interferon response occurs in SHFV-inoculated rhesus monkeys, but it is unclear  
378 whether a similar response is present in SHFV-inoculated patas monkeys. NK cell  
379 responses are important for survival in human Ebola virus disease cases ([28](#), [29](#)).  
380 Differences in the timing of NK cell responses are a key difference in non-lethal, mild  
381 disease and lethal, severe (Lassa virus) infections in macaques ([30](#)), suggesting the

382 species-specific NK cell responses observed here warrant further exploration. For  
383 comparison, and as described in the accompanying paper by Buechler *et al.*, olive  
384 baboons and rhesus monkeys infected with SWBV-1 also developed increases in NK  
385 and CD8<sup>+</sup> T-cell numbers, with CD8<sup>+</sup> T-cell numbers remaining elevated through the  
386 observation period. NK cell dynamics suggest a short-lived peak in olive baboons and  
387 rhesus monkeys that did not develop severe disease due to SWBV-1 infection.  
388 Together, these data support a role for appropriate timing and activation of NK cells in  
389 modulating disease presentation in VHF.

390 Increased detection of Iba1, a macrophage marker, suggests that SHFV infection  
391 leads to an increase in the number of macrophages in the liver (31). Determining the  
392 sources of these additional liver macrophages in SHFV-inoculated patas monkeys is  
393 important given the changes in MCP-1 concentrations and the differential roles of  
394 hepatic resident and non-resident macrophages (32-35). SHFV is dependent on CD163  
395 for cellular entry (36), and preferential targeting of CD163<sup>+</sup> cells by SHFV may explain  
396 why both patas and rhesus monkeys lost CD163<sup>+</sup> macrophages. CD163 is associated  
397 with alternatively-polarized macrophages and macrophage polarization has a significant  
398 role in immunity and infection (37-39). Additionally, the presence of rounded and  
399 vacuolated macrophages in the livers of SHFV-inoculated rhesus monkeys but not their  
400 patas counter parts suggests an active response to infection and that tissue-resident  
401 macrophages may play a key role in SHFV pathogenesis. Future serial-sampling  
402 studies will be required to fully characterize tissue-specific immune responses over the  
403 course of SHFV infection, but will be challenging since the disease is not uniformly  
404 lethal.

405 Consistent with the complete blood counts, flow cytometry revealed early decreases  
406 in both CD4<sup>+</sup> and CD8<sup>+</sup> T-cells supporting the presence of lymphopenia in both patas  
407 and rhesus monkeys. Interestingly, on day 2 PI, both SHFV-inoculated patas and  
408 rhesus monkeys had an increase in Ki-67<sup>+</sup> CD8<sup>+</sup> T-cell numbers, suggesting some level  
409 of proliferation was present even in the face of depletion ([40](#), [41](#)). On days 8 and 10 PI,  
410 CD8<sup>+</sup> T-cell counts returned to baseline in all monkeys. This return coincided with a  
411 second spike in Ki-67<sup>+</sup> CD8<sup>+</sup> counts and the start of an elevated count of PD-1<sup>+</sup> CD8<sup>+</sup> T-  
412 cells. PD-1 is associated with T-cell exhaustion and is also found on activated T-cells  
413 ([42](#), [43](#)). PD-1<sup>+</sup> T-cells and CD8<sup>+</sup> T-cells appear to play important roles in human cases  
414 of Ebola virus disease ([28](#), [29](#), [44-46](#)). Consequently, it may be fruitful to determine if  
415 SHFV provides a means for studying the role of T-cell dysfunction in EVD. As SHFV is  
416 capable of infecting antigen-presenting cells, it will be important to determine if poor T-  
417 cell responses during SHFV infection are due to deficits in antigen presentation as is  
418 suspected to be the case during Ebola virus infection in humans and non-human  
419 primates ([21](#), [46-50](#)). T-cell exhaustion has also been implicated in chronic viral  
420 infections and may be an important mechanism in the development of persistent SHFV  
421 infections in patas monkeys ([43](#)). Given the extreme differences in disease course and  
422 outcomes during SHFV infection in patas and rhesus monkeys the relatively high  
423 degree of overlap in host-response features was unexpected. Changes in IFN- $\gamma$  and  
424 MCP-1 concentrations, and circulating macrophage, NK, and T-cell populations were  
425 similar between SHFV-inoculated patas and rhesus monkeys. Interestingly, viral loads  
426 were largely similar between all monkeys and ISH data suggests that SHFV targets the  
427 same cell types in cercopithecines. Our data suggests that when biologically similar

428 primates of two species are infected with the same pathogen that host responses are  
429 initially quite similar however, as the virus interacts with the host to modulate the  
430 immune response, the effectiveness of the immune response is diminished, likely as a  
431 result of the degree of adaptation to the host.

432       Rather than a “cytokine storm”, we propose that a process driven by NK cells and  
433 macrophages is the deciding factor in developing hemorrhagic fever, either alone, or  
434 through their impacts on otherwise beneficial or seemingly inconsequential host-  
435 responses. Ultimately, the differences in disease course in SHFV patas and rhesus  
436 monkeys are due to their biological differences, ranging from organism-level physiology  
437 to minute genotypic differences. Although biologically similar, patas and rhesus  
438 monkeys are distinct species. A core drawback of the approach taken in the paper is  
439 that although it is relatively simple to catalogue host-responses in monkeys of two  
440 species, it is difficult to contextualize them. Without extensive characterization, it is  
441 challenging to determine which impact a given host-response has on members of each  
442 species: clear differences may have no impact on disease whereas topically similar  
443 responses may have divergent functional impacts.

444       However, as a tool for identifying host-response mechanisms as targets for medical  
445 countermeasures against viral hemorrhagic fevers, the issue of biological differences  
446 may become more tractable. Interactions between cell-cell and cell-SHFV interactions  
447 may be driven by highly-specific mechanics and are therefore far more difficult to  
448 translate or target. On the other hand, the resulting functional differences are more  
449 readily targetable. For example, it may be that the large differences in IL-6  
450 concentrations between patas and rhesus monkeys observed in this work are driven by

451 SHFV-infected macrophages. Rather than attempting to navigate the convolutions of  
452 species-specific macrophage biology, targeting IL-6-producing macrophages, IL-6, or  
453 the IL-6 receptor offer far more direct paths to identifying druggable targets. Under the  
454 macrophage/IL-6 example and in the context of identifying targets for therapeutic  
455 development, the minutiae of species-specific macrophage biology may be rather  
456 unimportant when the results of those biologies suggest a common target.

457 A top down approach to more fully characterize SHFV infection in patas and rhesus  
458 monkeys will streamline identification of host components or sub-systems that are  
459 sources of responses that result in VHF. Identification of and targeting the high-level  
460 responses could ultimately even result in pan-VHF therapeutics.

461

## 462 **MATERIALS AND METHODS**

463 **Cells and Virus.** Simian hemorrhagic fever virus (SHFV; *Nidovirales: Arteriviridae:*  
464 *Simartevirus: Simian hemorrhagic fever virus*) strain LVR42-0/M6941 ([51](#)) was  
465 passaged twice before a final passage on MA-104 cells to create the virus stock. Briefly,  
466 virus stock was prepared by freeze-thawing infected cells three times prior to  
467 clarification with low-speed centrifugation and was then concentrated by centrifugation  
468 at 16,000xg. Pellets were resuspended in PBS and combined. The final viral stock was  
469 sequenced as in ([52](#)) for quality control purposes (GenBank accession number  
470 pending). Sequencing confirmed the expected genotype and lack of any contamination.

471 **Animals.** Six patas monkeys (4 females and 2 males) and 6 rhesus monkeys (3  
472 females and 3 males) were used in this study. Patas monkeys ranged from 5.51–14.01

473 kg in weight and 9–14 years in age, whereas rhesus monkeys ranged from 4.77–12.75  
474 kg in weight and 8–12 years in age. Rhesus monkeys were obtained from the National  
475 Institute of Allergy and Infectious Disease (NIH/NIAID) rhesus monkey colony. Patas  
476 monkeys were obtained from the National Institute of Child Health and Human  
477 Development (NIH/NICHD). Subjects were screened for simian T-lymphotrophic virus,  
478 simian immunodeficiency virus, and simian retrovirus infections, and cleared for use in  
479 the experiment by the facility veterinarian. Patas monkeys were determined to be  
480 serologically negative for SHFV prior to enrollment. Rhesus monkeys were obtained  
481 from a SHFV-free source, and therefore were not screened prior to use in this  
482 experiment. Subjects were randomly assigned to 4 groups (2 groups of patas monkeys,  
483 inoculated and mock-inoculated, and 2 groups of rhesus monkeys, inoculated and  
484 mock-inoculated), for sex, age and weight. The animals of one group of patas monkeys  
485 and 1 group of rhesus monkeys each received 5,000 PFU of SHFV diluted in 1 ml of  
486 PBS, whereas the animals of the remaining groups each received 1 ml of PBS (mock)  
487 by intramuscular injection of the right quadriceps. Subjects were housed in separate  
488 rooms and had access to food and water *ad libitum*.

489 Subjects were monitored at least twice daily. Physical exams were performed on  
490 pre-determined experimental days (-9, -6, 0, 2, 4, 6, 8, 10, 12, 15, 19, and 21) and prior  
491 to euthanasia. Blood was collected on all physical exam days, except day 0, and prior to  
492 euthanasia. Scheduled days for euthanasia with necropsy were as follows: mock-  
493 inoculated patas monkeys at 19 days post-inoculation, SHFV-inoculated patas monkeys  
494 at 21 days post-inoculation, mock-inoculated rhesus monkeys at 10 days post-  
495 inoculation, and SHFV-inoculated rhesus monkeys at 20 days post-inoculation. Subjects

496 were euthanized at scheduled times or upon reaching pre-established clinical endpoint  
497 criteria including overall clinical appearance, respiratory function, responsiveness, and  
498 core body temperature. At euthanasia, subjects were perfused with saline before  
499 necropsy and sample collection. Subjects were housed in an AAALAC, International,  
500 accredited facility under biosafety level 4 (BSL-4) conditions due to the nature of the  
501 facility in which the experiments were performed. All experimental procedures were  
502 approved by the NIAID DCR Animal Care and Use Committee and were performed in  
503 compliance with the Animal Welfare Act regulations, Public Health Service policy, and  
504 the Guide for the Care and Use of Laboratory Animals recommendations.

505 **Virus Quantification.** Virus stock and tissue concentrations were determined by  
506 plaque assay on MA-104 cells. Briefly, serial dilutions of 10% (w/v) tissue homogenates  
507 were added to cell monolayers and incubated for 1 h. Then, monolayers were overlaid  
508 with 0.8% tragacanth (Sigma, St. Louse, MO), MEM (Lonza, Walkersville, MD), 1%  
509 penicillin-streptomycin (Lonza) and 2% heat-inactivated fetal bovine serum (Sigma) final  
510 concentration. After a 3-day incubation, overlays were aspirated, and monolayers fixed  
511 using 10% neutral-buffered formalin (Fisher Scientific, Hampton, TN) with 0.2% crystal  
512 violet (Ricca, Arlington, TC) prior to enumeration.

513 **Plasma Cytokines.** Plasma concentrations of granulocyte-macrophage colony  
514 stimulating factor (GM-CSF), interferon gamma (IFN- $\gamma$ ), macrophage chemoattractant  
515 protein 1 (MCP-1), vascular endothelium growth factor (VEGF), and interleukins 2, 4, 6,  
516 8, 10, and 17 were measured using a Milliplex non-human primate kit (MilliporeSigma,  
517 St Louis, MO) as described previously ([13](#)).

518       **Hematology.** Complete blood counts (Sysmex XS1000i, Lincolnshire, IL) and  
519 selected serum chemistries using Piccolo General Chemistry 13 kits (Abaxis, Union  
520 City, CA) were performed at the described timepoints using blood collected in K3 EDTA  
521 and SST tubes (BD, San Jose, CA). Due to a lack of published data, standard ranges  
522 for patas monkeys were defined as the mean +/- two standard deviations of all pre-  
523 exposure timepoints. Standard ranges for rhesus monkeys were determined from data  
524 kept by veterinary staff on subjects housed in the facility.

525       **Histology, *In Situ* Hybridization, and Immunohistochemistry.** Formalin-fixed  
526 paraffin-embedded (FFPE) animal tissue sections (5  $\mu$ m) were used for  
527 immunohistochemical staining using the following antibodies: NKG2A (Abcam,  
528 Cambridge, MA); Iba1 (Wako, Richmond, VA); MHC1 [Clone EPR1394Y] (Abcam); CD8  
529 (Abcam); CD3 [Clone 12] (AbD, Serotec Hercules, CA). Staining was performed on the  
530 Bond RX platform (Leica Biosystems) according to the manufacturer's protocol. Briefly,  
531 sections were baked, deparaffinized, and rehydrated. Epitope retrieval was performed  
532 using Leica Epitope Retrieval Solution 1, pH 6.0, heated to 100°C for 20 min, and  
533 quenched with hydrogen peroxide prior to addition of primary antibody. The Bond  
534 Polymer Refine Detection kit (Leica Biosystems) was used for chromogen detection.  
535 Image analysis was performed on select tissues from all groups to quantify the degree  
536 of positive staining. Images were obtained on a bright-field Leica Aperio AT2 slide  
537 scanner (Leica Biosystems) and processed using Aperio Image Scope [v12.3]  
538 algorithms. The Positive Pixel Count Algorithm was used to assign pixels to intensity  
539 ranges for positive (strong ( $n_{sp}$ ), medium ( $n_p$ ), and weak ( $n_{wp}$ )) and negative ( $n_n$ ) pixels.



540 Pixels were categorized, and positive percentage was calculated per image as a  
541 fraction of the number of strong positive ( $n_{sp}$ ) pixel to the total number of stained pixels:

$$542 \quad \%_{positive} = \frac{n_{sp}}{n_{total}} * 100 = \frac{n_{sp}}{(n_{sp} + n_p + n_{wp} + n_n)} * 100$$

543 SHFV RNA RNAscope *in situ* hybridization (ISH) was performed as previously  
544 described ([53](#)).

545 **Electron Microscopy.** Electron microscopy samples were processed and imaged  
546 as previously reported ([54](#)).

547 **qPCR viremia.** Monkey peripheral blood samples were inactivated in 3 volumes of  
548 Trizol LS buffer (Thermo Fisher Scientific, Waltham, MA) and RNA was extracted using  
549 the Qiagen AllPrep 96 kit as described by manufacturer (Qiagen, Valencia, CA) except  
550 that each sample was treated with 27 units of DNase I (Qiagen). SHFV RNA copy  
551 number was determined by RT-qPCR using primers and probes targeting the SHFV  
552 gp15 nucleocapsid gene. The AgPath-ID One-Step RT-PCR kit (Thermo Fisher  
553 Scientific) was used to perform the assay. Primers and Cal Fluor Orange 560/BHQ1  
554 labeled probe were synthesized by LCG Biosearch Technologies (Petaluma, CA). RT-  
555 qPCR reactions were performed in 20- $\mu$ l reactions using forward primer (5'-  
556 CGACCTCCGAGTTGTTCTACCT-3'), reverse primer (5'-  
557 GCCTCCGTTGTCGTAGTACCT-3'), and fluorescent probe (5'-  
558 CCCACCTCAGCACACATCAAACAGCT-3'). Synthetic DNA (5'-  
559 TTTCCGCCGAACCCGGCGACCTCCGAGTTGTTCTACCTGGTCCCACCTCAGCACAC  
560 ATCAAACAGCTGCTGATCAGGTACTACGACAACGGAGGCGGAAATCTTTCATATG-  
561 3'; LCG Biosearch Technologies, Novato, CA) was used as a standard. The qPCR

562 reactions were run at 50 °C for 10 min, 95 °C for 10 min, 55 cycles of 95 °C for 15 s,  
563 and 60 °C for 45 s on a 7900HT Fast Real-Time PCR System (Thermo Fisher  
564 Scientific). Data were analyzed using Applied Biosystems 7900HT Fast Real-Time PCR  
565 System Software (Thermo Fisher Scientific).

566 **Flow Cytometry.** Whole blood was assessed for the following markers: HLA-DR-  
567 FITC (BioLegend, San Diego, CA), CD16-APC (BD), PD-1-APC-Cy7 (BioLegend), CD3-  
568 AF700 (BD), CD11c-PE (BD), CD28-PE-Cy5 (BioLegend), NKG2a-PE-Cy7 (Beckman  
569 Coulter, Brea CA), CD163-PE/Dazzle594 (BioLegend), CD4-BV421 (BD), CD14-BV510  
570 (BioLegend), CD20-BV570 (BioLegend), CD8a-BV605 (BD), CD123-BV650 (BD), PD-  
571 L1-BV711 (BioLegend), CD95-BV785 (BioLegend), and Ki-67-PerCP-Cy5.5 (BD).  
572 Briefly, 100 µl of whole blood was incubated with 100 µl of the marker panel (excluding  
573 Ki-67) and incubated for 20 min. Red blood cells were lysed with 1 ml of BD FACSLyse  
574 (BD) for 10 min. Cells were washed and fixed for 30 min using BD Cytotfix/Cytoperm  
575 (BD) and incubated with Ki-67 antibody for 30 min at 4° C, followed by a final wash in  
576 1xBD Permwash (BD). Data acquisition and analysis was performed with FlowJo  
577 version 10.2 (BD).

578 **Enzyme-linked immunosorbent Assays.** Lysates from MA-104 cells infected with  
579 SHVF or mock infected (media only) were used as substrates. Immulon 2 HB  
580 microplates (Thermo Fisher Scientific, Walkersville, MD) were coated with cell lysates  
581 diluted in PBS and incubated overnight at 4°C. Plates were then washed five times with  
582 wash buffer comprised of PBS/0.2% Tween 20 and blocked for 2 h at room temperature  
583 with 5% nonfat milk (LabScientific, Highlands, NJ, USA) dissolved in PBS. Plates were  
584 then washed five times with wash buffer, and analyte serum diluted at 1:50 in PBS/2.5%

585 milk/0.05% Tween 20 was added in duplicate to corresponding wells. After a 1-h  
586 incubation at room temperature, plates were washed and horseradish peroxidase-  
587 conjugated anti-monkey IgG (Sigma Aldrich, St. Louis, MO, USA; A2054) was added.  
588 Plates were then incubated for 1 h at room temperature before washing with wash  
589 buffer and adding TMB Substrate (Thermo Fisher Scientific, Walkersville, MD, USA).  
590 Following a 10-min incubation, 100  $\mu$ l of TMB stop solution (Thermo Fisher Scientific,  
591 Walkersville, MD, USA) were added to each well and the plates were read on a  
592 SpectraMax Plus 384 plate reader (Molecular Devices, Sunnyvale, CA, USA) at 450 nm.

### 593 **Acknowledgments**

594 This work, in part, was supported by the NIAID Division of Intramural Research and  
595 the NIAID Division of Clinical Research via the Battelle Memorial Institute's prime  
596 contract with the National Institute of Allergy and Infectious Diseases (NIAID) at the  
597 National Institutes of Health, under contract no. HHSN272200700016I (DP, KRHP, SM,  
598 JGB, JHK).

599 We would like to thank the entire EVPS and IRF-Frederick staff for their support of  
600 the experiments. We especially would like to thank Tim Cooper (IRF-Frederick) for his  
601 help in establishing standard ranges for complete blood counts and serum chemistries.  
602 We also would like to thank Laura Bollinger and Jiro Wada (IRF-Frederick) for technical  
603 writing services and figure preparation, respectively.

604

### 605 **Figure Legends**

606 **Fig 1:** Alanine aminotransferase (A), alkaline phosphatase (B), aspartate  
607 aminotransferase (C), gamma-glutamyltransferase (D), reticulocyte number (E), globulin  
608 (F), hematocrit (HCT) (G), albumin (H), lymphocyte number (I), monocyte number (J)  
609 values for patas monkeys (orange lines) and rhesus monkeys (blue lines) either  
610 inoculated with 5,000 PFU of SHFV (open symbols) or with PBS (closed symbols).  
611 Shaded regions represent standard range of all pre-exposure values for patas monkeys  
612 or previously collected values for rhesus monkeys. Data represent means of each  
613 group.

614 **Fig 2:** Representative images of liver immunohistochemistry for Iba1 in livers of  
615 mock- and SHFV-inoculated patas and rhesus monkeys; inset images highlight  
616 macrophage morphology for each group (A). Representative images of *in situ*  
617 hybridization for SHFV viral RNA in terminal cerebellum, brain stem, spleen, femoral  
618 bone marrow and liver samples from patas and rhesus monkeys inoculated with SHFV  
619 (B).

620 **Fig 3:** Mean viremia values in viral RNA copies per ml of whole blood for mock (solid  
621 symbols) and SHFV-inoculated (open symbols) patas monkeys (orange) and rhesus  
622 monkeys (blue) (A). Mean titer of tissues for SHFV-inoculated patas monkeys (orange)  
623 and rhesus monkeys (blue) in PFU per mg of 10% tissue homogenate (B, Lymph Node  
624 (LN)). Electron micrograph of jejunum from a SHFV-inoculated patas monkey showing  
625 double-membrane vesicles (C). Electron micrograph of jejunum from a SHFV-inoculated  
626 patas monkey showing apparently mature virions (yellow arrowheads) (D).

627 **Fig 4:** Mean quantitative immunohistochemistry values of indicated marker in mock-  
628 and SHFV-inoculated patas and rhesus monkey livers and spleens (A, B). Mean plasma

629 concentrations in pg per ml of indicated analyte for mock (closed symbols) and SHFV-  
630 inoculated (open symbols) patas monkeys (orange) and rhesus monkeys (blue) (C–E).  
631 Gray lines represent the lower and upper limits of quantitation (LLOQ and ULOQ,  
632 respectively).

633 **Fig 5:** Mean percentage of indicated cell populations from whole blood of mock  
634 (closed symbols) and SHFV-inoculated (open symbols) patas monkeys (orange) and  
635 rhesus monkeys (blue) (A-F).

636 **Fig 6:** Mean ELISA absorbance values for patas monkeys (orange) and rhesus  
637 monkeys (blue) either inoculated with 5,000 PFU of SHFV (open symbols) or with PBS  
638 (closed symbols).

639

## 640 **References**

- 641 1. **Singh SK, Ruzek D (ed).** 2013. Viral Hemorrhagic Fevers. Taylor &  
642 Francis/CRC Press, Boca Raton, USA.
- 643 2. **Kuhn JH, Clawson AN, Radoshitzky SR, Wahl-Jensen V, Bavari S, Jahrling**  
644 **PB.** 2013. Viral hemorrhagic fevers: history and definitions, p 3–13. *In* Singh SK,  
645 Ruzek D (ed), Viral hemorrhagic fevers doi:10.1201/b15172-3. Taylor &  
646 Francis/CRC Press, Boca Raton, USA.
- 647 3. **Paessler S, Walker DH.** 2013. Pathogenesis of the viral hemorrhagic fevers.  
648 *Annu Rev Pathol* **8**:411-440.
- 649 4. **Faaberg KS, Balasuriya UB, Brinton MA, Gorbalenya AE, Leung FC-C,**  
650 **Nauwynck H, Snijder EJ, Stadejek T, Yang H, Yoo D.** 2011. Family

- 651            *Arteriviridae*. In King AMQ, Adams MJ, Carstens EB, Lefkowitz EJ (ed), Virus  
652            taxonomy—Ninth Report of the International Committee on Taxonomy of Viruses.  
653            Elsevier/Academic Press, London, UK.
- 654    5.    **Kuhn JH, Lauck M, Bailey AL, Shchetinin AM, Vishnevskaya TV, Bào Y, Ng**  
655            **TFF, LeBreton M, Schneider BS, Gillis A, Tamoufe U, Dikko JLD, Takuo JM,**  
656            **Kondov NO, Coffey LL, Wolfe ND, Delwart E, Clawson AN, Postnikova E,**  
657            **Bollinger L, Lackemeyer MG, Radoshitzky SR, Palacios G, Wada J,**  
658            **Shevtsova ZV, Jahrling PB, Lapin BA, Deriabin PG, Dunowska M,**  
659            **Alkhovsky SV, Rogers J, Friedrich TC, O'Connor DH, Goldberg TL.** 2016.  
660            Reorganization and expansion of the nidoviral family *Arteriviridae*. *Arch Virol*  
661            **161:755–768.**
- 662    6.    **Bailey AL, Lauck M, Sibley SD, Pecotte J, Rice K, Weny G, Tumukunde A,**  
663            **Hyeroba D, Greene J, Correll M, Gleicher M, Friedrich TC, Jahrling PB,**  
664            **Kuhn JH, Goldberg TL, Rogers J, O'Connor DH.** 2014. Two novel simian  
665            arteriviruses in captive and wild baboons (*Papio* spp.). *J Virol* **88:13231-13239.**
- 666    7.    **Lauck M, Sibley SD, Hyeroba D, Tumukunde A, Weny G, Chapman CA, Ting**  
667            **N, Switzer WM, Kuhn JH, Friedrich TC, O'Connor DH, Goldberg TL.** 2013.  
668            Exceptional simian hemorrhagic fever virus diversity in a wild African primate  
669            community. *J Virol* **87:688-691.**
- 670    8.    **Gravell M, London WT, Leon M, Palmer AE, Hamilton RS.** 1986. Elimination  
671            of persistent simian hemorrhagic fever (SHF) virus infection in patas monkeys.  
672            *Proc Soc Exp Biol Med* **181:219-225.**

- 673 9. **Lauck M, Alkhovsky SV, Bào Y, Bailey AL, Shevtsova ZV, Shchetinin AM,**  
674 **Vishnevskaya TV, Lackemeyer MG, Postnikova E, Mazur S, Wada J,**  
675 **Radoshitzky SR, Friedrich TC, Lapin BA, Deriabin PG, Jahrling PB,**  
676 **Goldberg TL, O'Connor DH, Kuhn JH.** 2015. Historical outbreaks of simian  
677 hemorrhagic fever in captive macaques were caused by distinct arteriviruses. *J*  
678 *Virology* **89**:8082-8087.
- 679 10. **Wahl-Jensen V, Johnson JC, Lauck M, Weinfurter JT, Moncla LH, Weiler**  
680 **AM, Charlier O, Rojas O, Byrum R, Ragland DR, Huzella L, Zommer E,**  
681 **Cohen M, Bernbaum JG, Cai Y, Sanford HB, Mazur S, Johnson RF, Qin J,**  
682 **Palacios GF, Bailey AL, Jahrling PB, Goldberg TL, O'Connor DH, Friedrich**  
683 **TC, Kuhn JH.** 2016. Divergent simian arteriviruses cause simian hemorrhagic  
684 fever of differing severities in macaques. *MBio* **7**:e02009-02015.
- 685 11. **Tauraso NM, Shelokov A, Palmer AE, Allen AM.** 1968. Simian hemorrhagic  
686 fever. III. Isolation and characterization of a viral agent. *Am J Trop Med Hyg*  
687 **17**:422-431.
- 688 12. **Palmer AE, Allen AM, Tauraso NM, Shelokov A.** 1968. Simian hemorrhagic  
689 fever. I. Clinical and epizootiologic aspects of an outbreak among quarantined  
690 monkeys. *Am J Trop Med Hyg* **17**:404-412.
- 691 13. **Johnson RF, Dodd LE, Yellayi S, Gu W, Cann JA, Jett C, Bernbaum JG,**  
692 **Ragland DR, St Claire M, Byrum R, Paragas J, Blaney JE, Jahrling PB.** 2011.  
693 Simian hemorrhagic fever virus infection of rhesus macaques as a model of viral  
694 hemorrhagic fever: clinical characterization and risk factors for severe disease.  
695 *Virology* **421**:129-140.

- 696 14. **Vatter HA, Donaldson EF, Huynh J, Rawlings S, Manoharan M, Legasse A,**  
697 **Planer S, Dickerson MF, Lewis AD, Colgin LMA, Axthelm MK, Pecotte JK,**  
698 **Baric RS, Wong SW, Brinton MA.** 2015. A simian hemorrhagic fever virus  
699 isolate from persistently infected baboons efficiently induces hemorrhagic fever  
700 disease in Japanese macaques. *Virology* **474**:186-198.
- 701 15. **Vatter HA, Brinton MA.** 2014. Differential responses of disease-resistant and  
702 disease-susceptible primate macrophages and myeloid dendritic cells to simian  
703 hemorrhagic fever virus infection. *J Virol* **88**:2095-2106.
- 704 16. **Smith DR, Holbrook MR, Gowen BB.** 2014. Animal models of viral hemorrhagic  
705 fever. *Antiviral Res* **112**:59-79.
- 706 17. **Amman BR, Swanepoel R, Nichol ST, Towner JS.** 2017. Ecology of filoviruses.  
707 *Curr Top Microbiol Immunol* **411**:23-61.
- 708 18. **Radoshitzky SR, Kuhn JH, Jahrling PB, Bavari S.** 2018. Hemorrhagic fever-  
709 causing mammarenaviruses, p 517-545. *In* Bozue J, Cote CK, Glass PJ (ed),  
710 *Medical aspects of biological warfare*. Borden Institute, US Army Medical  
711 Department Center and School, Health Readiness Center of Excellence, Fort  
712 Sam Houston, Texas, USA.
- 713 19. **Radoshitzky SR, Bào Y, Buchmeier MJ, Charrel RN, Clawson AN, Clegg CS,**  
714 **DeRisi JL, Emonet S, Gonzalez J-P, Kuhn JH, Lukashevich IS, Peters CJ,**  
715 **Romanowski V, Salvato MS, Stenglein MD, de la Torre JC.** 2015. Past,  
716 present, and future of arenavirus taxonomy. *Arch Virol* **160**:1851–1874.
- 717 20. **Vela E.** 2012. Animal models, prophylaxis, and therapeutics for arenavirus  
718 infections. *Viruses* **4**:1802-1829.



- 719 21. **Hutchinson KL, Rollin PE.** 2007. Cytokine and chemokine expression in  
720 humans infected with Sudan Ebola virus. *J Infect Dis* **196 Suppl 2**:S357-363.
- 721 22. **Rhein BA, Powers LS, Rogers K, Anantpadma M, Singh BK, Sakurai Y, Bair**  
722 **T, Miller-Hunt C, Sinn P, Davey RA, Monick MM, Maury W.** 2015. Interferon- $\gamma$   
723 inhibits Ebola virus infection. *PLoS Pathog* **11**:e1005263.
- 724 23. **Wauquier N, Becquart P, Padilla C, Baize S, Leroy EM.** 2010. Human fatal  
725 Zaire Ebola virus infection is associated with an aberrant innate immunity and  
726 with massive lymphocyte apoptosis. *PLoS Negl Trop Dis* **4**:e837.
- 727 24. **Asper M, Sternsdorf T, Hass M, Drosten C, Rhode A, Schmitz H, Günther S.**  
728 2004. Inhibition of different Lassa virus strains by alpha and Ggamma interferons  
729 and comparison with a less pathogenic arenavirus. *J Virol* **78**:3162-3169.
- 730 25. **Kolokoltsova OA, Yun NE, Poussard AL, Smith JK, Smith JN, Salazar M,**  
731 **Walker A, Tseng C-TK, Aronson JF, Paessler S.** 2010. Mice lacking alpha/beta  
732 and gamma interferon receptors are susceptible to Junin virus infection. *J Virol*  
733 **84**:13063-13067.
- 734 26. **Patterson M, Seregin A, Huang C, Kolokoltsova O, Smith J, Miller M, Smith**  
735 **J, Yun N, Poussard A, Grant A, Tigabu B, Walker A, Paessler S.** 2014.  
736 Rescue of a recombinant Machupo virus from cloned cDNAs and *in vivo*  
737 characterization in interferon ( $\alpha\beta/\gamma$ ) receptor double knockout mice. *J Virol*  
738 **88**:1914-1923.
- 739 27. **Verstrepen BE, Fagrouch Z, van Heteren M, Buitendijk H, Haaksma T,**  
740 **Beenhakker N, Palù G, Richner JM, Diamond MS, Bogers WM, Barzon L,**  
741 **Chabierski S, Ulbert S, Kondova I, Verschoor EJ.** 2014. Experimental

- 742 infection of rhesus macaques and common marmosets with a European strain of  
743 West Nile virus. *PLoS Negl Trop Dis* **8**:e2797.
- 744 28. **Liu X, Speranza E, Muñoz-Fontela C, Haldenby S, Rickett NY, Garcia-Dorival**  
745 **I, Fang Y, Hall Y, Zekeng E-G, Lüdtke A, Xia D, Kerber R, Krumkamp R,**  
746 **Duraffour S, Sissoko D, Kenny J, Rockliffe N, Williamson ED, Laws TR,**  
747 **N'Faly M, Matthews DA, Günther S, Cossins AR, Sprecher A, Connor JH,**  
748 **Carroll MW, Hiscox JA.** 2017. Transcriptomic signatures differentiate survival  
749 from fatal outcomes in humans infected with Ebola virus. *Genome Biol* **18**:4.
- 750 29. **Cimini E, Viola D, Cabeza-Cabrerizo M, Romanelli A, Tumino N, Sacchi A,**  
751 **Bordoni V, Casetti R, Turchi F, Martini F, Bore JA, Koundouno FR,**  
752 **Duraffour S, Michel J, Holm T, Zekeng EG, Cowley L, Garcia Dorival I,**  
753 **Doerrbecker J, Hetzelt N, Baum JHJ, Portmann J, Wölfel R, Gabriel M,**  
754 **Miranda O, Díaz G, Díaz JE, Fleites YA, Piñeiro CA, Castro CM, Koivogui L,**  
755 **Magassouba NF, Diallo B, Ruibal P, Oestereich L, Wozniak DM, Lüdtke A,**  
756 **Becker-Ziaja B, Capobianchi MR, Ippolito G, Carroll MW, Günther S, Di Caro**  
757 **A, Muñoz-Fontela C, Agrati C.** 2017. Different features of V $\delta$ 2 T and NK cells in  
758 fatal and non-fatal human Ebola infections. *PLoS Negl Trop Dis* **11**:e0005645.
- 759 30. **Rasmussen AL, Tchitchek N, Safronetz D, Carter VS, Williams CM, Haddock**  
760 **E, Korth MJ, Feldmann H, Katze MG.** 2015. Delayed inflammatory and cell  
761 death responses are associated with reduced pathogenicity in Lujo virus-infected  
762 cynomolgus macaques. *J Virol* **89**:2543-2552.
- 763 31. **Utans U, Arceci RJ, Yamashita Y, Russell ME.** 1995. Cloning and  
764 characterization of allograft inflammatory factor-1: a novel macrophage factor

- 765 identified in rat cardiac allografts with chronic rejection. *J Clin Invest* **95**:2954-  
766 2962.
- 767 32. **Baeck C, Wei X, Bartneck M, Fech V, Heymann F, Gassler N, Hittatiya K,**  
768 **Eulberg D, Luedde T, Trautwein C, Tacke F.** 2014. Pharmacological inhibition  
769 of the chemokine C-C motif chemokine ligand 2 (monocyte chemoattractant  
770 protein 1) accelerates liver fibrosis regression by suppressing Ly-6C<sup>+</sup>  
771 macrophage infiltration in mice. *Hepatology* **59**:1060-1072.
- 772 33. **Heymann F, Peusquens J, Ludwig-Portugall I, Kohlhepp M, Ergen C,**  
773 **Niemietz P, Martin C, van Rooijen N, Ochando JC, Randolph GJ, Luedde T,**  
774 **Ginhoux F, Kurts C, Trautwein C, Tacke F.** 2015. Liver inflammation abrogates  
775 immunological tolerance induced by Kupffer cells. *Hepatology* **62**:279-291.
- 776 34. **Karlmark KR, Weiskirchen R, Zimmermann HW, Gassler N, Ginhoux F,**  
777 **Weber C, Merad M, Luedde T, Trautwein C, Tacke F.** 2009. Hepatic  
778 recruitment of the inflammatory Gr1<sup>+</sup> monocyte subset upon liver injury promotes  
779 hepatic fibrosis. *Hepatology* **50**:261-274.
- 780 35. **Ramachandran P, Pellicoro A, Vernon MA, Boulter L, Aucott RL, Ali A,**  
781 **Hartland SN, Snowdon VK, Cappon A, Gordon-Walker TT, Williams MJ,**  
782 **Dunbar DR, Manning JR, van Rooijen N, Fallowfield JA, Forbes SJ, Iredale**  
783 **JP.** 2012. Differential Ly-6C expression identifies the recruited macrophage  
784 phenotype, which orchestrates the regression of murine liver fibrosis. *Proc Natl*  
785 *Acad Sci U S A* **109**:E3186-3195.
- 786 36. **Cai Y, Postnikova EN, Bernbaum JG, Yú SQ, Mazur S, Deiuliis NM,**  
787 **Radoshitzky SR, Lackemeyer MG, McCluskey A, Robinson PJ, Haucke V,**

- 788           **Wahl-Jensen V, Bailey AL, Lauck M, Friedrich TC, O'Connor DH, Goldberg**  
789           **TL, Jahrling PB, Kuhn JH.** 2015. Simian hemorrhagic fever virus cell entry is  
790           dependent on CD163 and uses a clathrin-mediated endocytosis-like pathway. *J*  
791           *Virolog* **89**:844-856.
- 792   37.   **Lasky CE, Olson RM, Brown CR.** 2015. Macrophage polarization during  
793           murine Lyme borreliosis. *Infect Immun* **83**:2627-2635.
- 794   38.   **Marino S, Cilfone NA, Mattila JT, Linderman JJ, Flynn JL, Kirschner DE.**  
795           2015. Macrophage polarization drives granuloma outcome during *Mycobacterium*  
796           *tuberculosis* infection. *Infect Immun* **83**:324-338.
- 797   39.   **Murray PJ, Wynn TA.** 2011. Protective and pathogenic functions of macrophage  
798           subsets. *Nat Rev Immunol* **11**:723-737.
- 799   40.   **Scholzen T, Gerdes J.** 2000. The Ki-67 protein: from the known and the  
800           unknown. *J Cell Physiol* **182**:311-322.
- 801   41.   **Shedlock DJ, Talbott KT, Morrow MP, Ferraro B, Hokey DA, Muthumani K,**  
802           **Weiner DB.** 2010. Ki-67 staining for determination of rhesus macaque T cell  
803           proliferative responses *ex vivo*. *Cytometry A* **77**:275-284.
- 804   42.   **Hong JJ, Amancha PK, Rogers K, Ansari AA, Villinger F.** 2013. Re-evaluation  
805           of PD-1 expression by T cells as a marker for immune exhaustion during SIV  
806           infection. *PLoS One* **8**:e60186.
- 807   43.   **Jin H-T, Anderson AC, Tan WG, West EE, Ha S-J, Araki K, Freeman GJ,**  
808           **Kuchroo VK, Ahmed R.** 2010. Cooperation of Tim-3 and PD-1 in CD8 T-cell  
809           exhaustion during chronic viral infection. *Proc Natl Acad Sci U S A* **107**:14733-  
810           14738.

- 811 44. **Agrati C, Castilletti C, Casetti R, Sacchi A, Falasca L, Turchi F, Tumino N,**  
812 **Bordoni V, Cimini E, Viola D, Lalle E, Bordi L, Lanini S, Martini F, Nicastrì E,**  
813 **Petrosillo N, Puro V, Piacentini M, Di Caro A, Kobinger GP, Zumla A,**  
814 **Ippolito G, Capobianchi MR.** 2016. Longitudinal characterization of  
815 dysfunctional T cell-activation during human acute Ebola infection. *Cell Death Dis*  
816 **7:e2164.**
- 817 45. **McElroy AK, Akondy RS, Davis CW, Ellebedy AH, Mehta AK, Kraft CS, Lyon**  
818 **GM, Ribner BS, Varkey J, Sidney J, Sette A, Campbell S, Ströher U, Damon**  
819 **I, Nichol ST, Spiropoulou CF, Ahmed R.** 2015. Human Ebola virus infection  
820 results in substantial immune activation. *Proc Natl Acad Sci U S A* **112:4719-**  
821 **4724.**
- 822 46. **Ruibal P, Oestereich L, Lüdtke A, Becker-Ziaja B, Wozniak DM, Kerber R,**  
823 **Korva M, Cabeza-Cabrerizo M, Bore JA, Koundouno FR, Duraffour S, Weller**  
824 **R, Thorenz A, Cimini E, Viola D, Agrati C, Repits J, Afrough B, Cowley LA,**  
825 **Ngabo D, Hinzmann J, Mertens M, Vitoriano I, Logue CH, Boettcher JP,**  
826 **Pallasch E, Sachse A, Bah A, Nitzsche K, Kuisma E, Michel J, Holm T,**  
827 **Zekeng E-G, García-Dorival I, Wölfel R, Stoecker K, Fleischmann E,**  
828 **Strecker T, Di Caro A, Avsic-Zupanc T, Kurth A, Meschi S, Mely S, Newman**  
829 **E, Bocquin A, Kis Z, Kelterbaum A, Molkenhain P, Carletti F, Portmann J, et**  
830 **al.** 2016. Unique human immune signature of Ebola virus disease in Guinea.  
831 *Nature* **533:100-104.**
- 832 47. **Bosio CM, Aman MJ, Grogan C, Hogan R, Ruthel G, Negley D,**  
833 **Mohamadzadeh M, Bavari S, Schmaljohn A.** 2003. Ebola and Marburg viruses

- 834 replicate in monocyte-derived dendritic cells without inducing the production of  
835 cytokines and full maturation. *J Infect Dis* **188**:1630-1638.
- 836 48. **Ilinykh PA, Lubaki NM, Widen SG, Renn LA, Theisen TC, Rabin RL, Wood**  
837 **TG, Bukreyev A.** 2015. Different temporal effects of Ebola virus VP35 and VP24  
838 proteins on global gene expression in human dendritic cells. *J Virol* **89**:7567-  
839 7583.
- 840 49. **Menicucci AR, Versteeg K, Woolsey C, Mire CE, Geisbert JB, Cross RW,**  
841 **Agans KN, Jankeel A, Geisbert TW, Messaoudi I.** 2017. Transcriptome  
842 analysis of circulating immune cell subsets highlight the role of monocytes in  
843 Zaire Ebola virus Makona pathogenesis. *Front Immunol* **8**:1372.
- 844 50. **Lubaki NM, Younan P, Santos RI, Meyer M, Iampietro M, Koup RA,**  
845 **Bukreyev A.** 2016. The Ebola interferon inhibiting domains attenuate and  
846 dysregulate cell-mediated immune responses. *PLoS Pathog* **12**:e1006031.
- 847 51. **Lauck M, Palacios G, Wiley MR, Li Y, Fāng Y, Lackemeyer MG, Cai Y, Bailey**  
848 **AL, Postnikova E, Radoshitzky SR, Johnson RF, Alkhovsky SV, Deriabin**  
849 **PG, Friedrich TC, Goldberg TL, Jahrling PB, O'Connor DH, Kuhn JH.** 2014.  
850 Genome sequences of simian hemorrhagic fever virus variant NIH LVR42-  
851 0/M6941 isolates (*Arteriviridae: Arterivirus*). *Genome Announc* **2**:e00978-00914.
- 852 52. **Cornish JP, Diaz L, Ricklefs SM, Kanakabandi K, Sword J, Jahrling PB,**  
853 **Kuhn JH, Porcella SF, Johnson RF.** 2017. Sequence of Reston virus isolate  
854 AZ-1435, an ebolavirus isolate obtained during the 1989-1990 Reston virus  
855 epizootic in the United States. *Genome Announc* **5**:S757-760.

- 856 53. **Yú SQ, Cai Y, Lyons C, Johnson RF, Postnikova E, Mazur S, Johnson JC,**  
857 **Radoshitzky SR, Bailey AL, Lauck M, Goldberg TL, O'Connor DH, Jahrling**  
858 **PB, Friedrich TC, Kuhn JH.** 2016. Specific detection of two divergent simian  
859 arteriviruses using RNAscope *in situ* hybridization. PLoS One **11**:e0151313.
- 860 54. **Perry DL, Huzella LM, Bernbaum JG, Holbrook MR, Jahrling PB, Hagen KR,**  
861 **Schnell MJ, Johnson RF.** 2018. Ebola virus localization in the macaque  
862 reproductive tract during acute Ebola virus disease. Am J Pathol **188**:550-558.
- 863

Figure 1

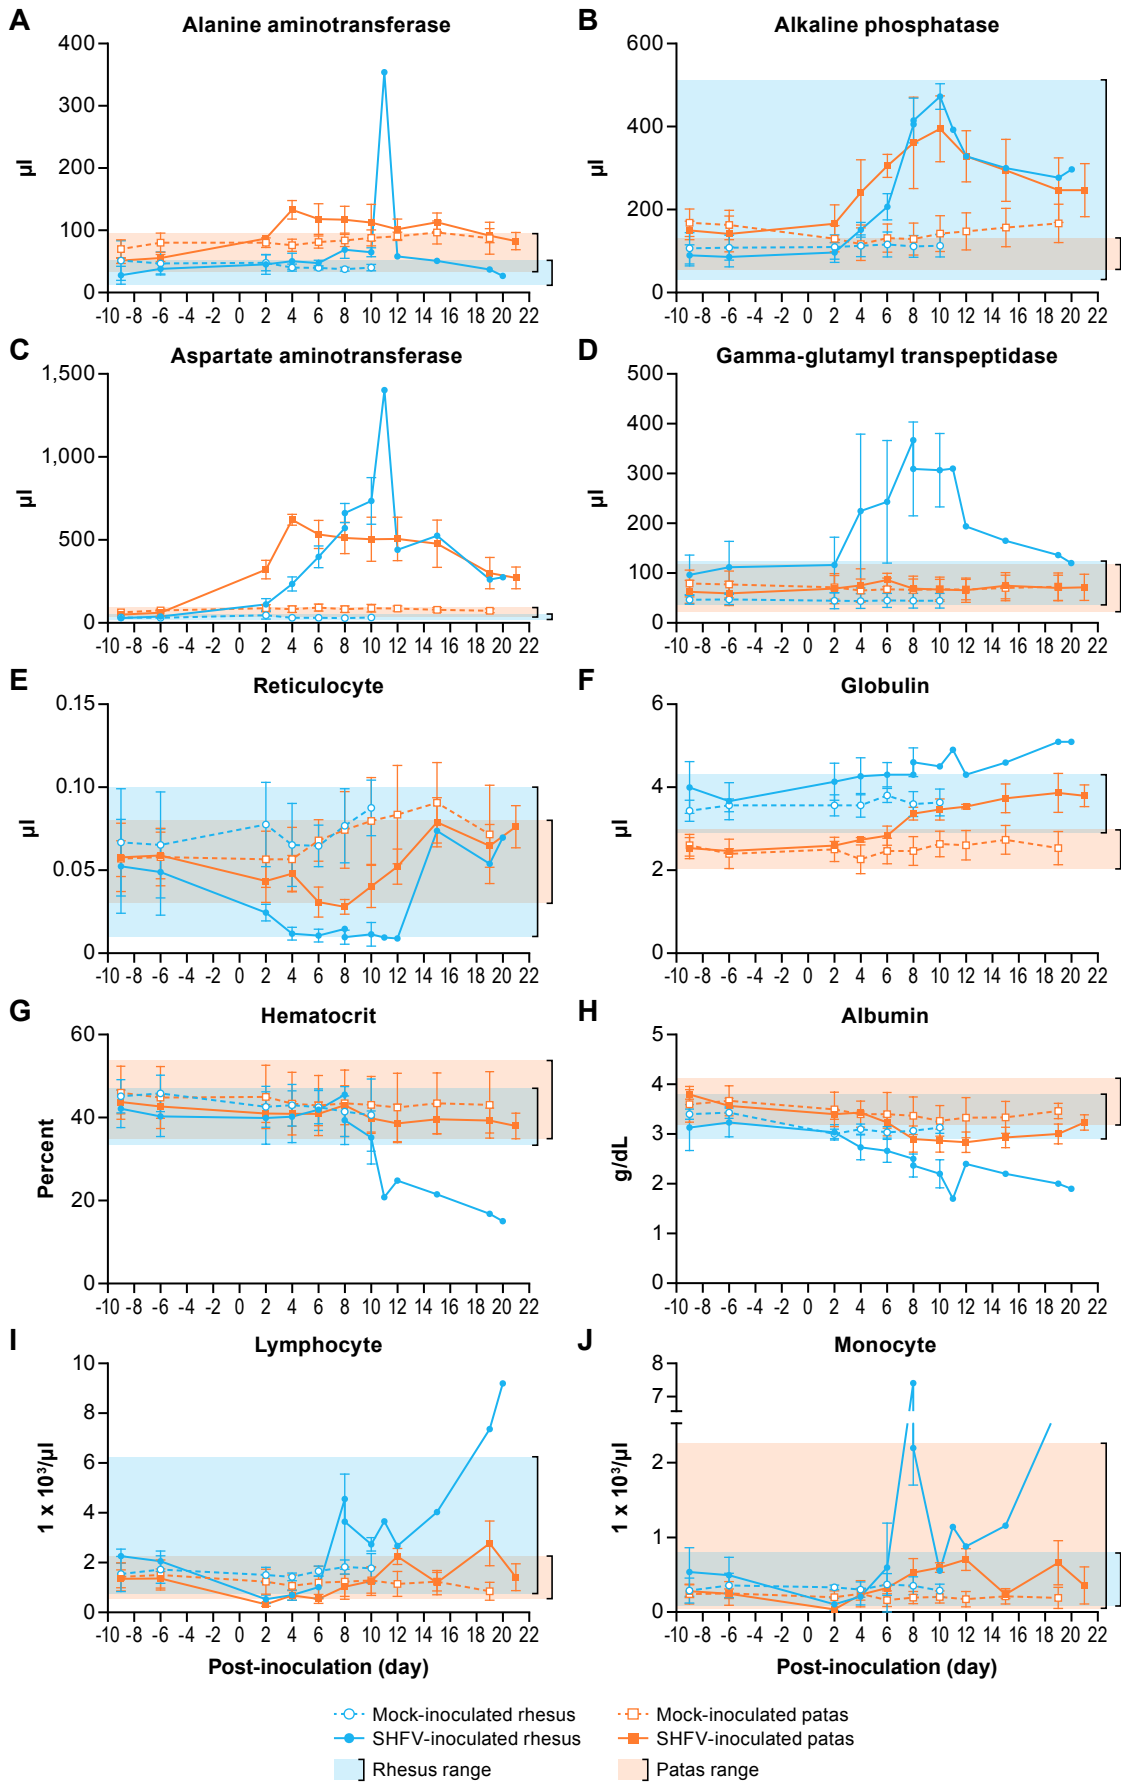

**Figure 1.** Alanine aminotransferase (A), alkaline phosphatase (B), aspartate aminotransferase (C), gamma-glutamyl transpeptidase (D), reticulocyte number (E), globulin (F), hematocrit (HCT) (G), albumin (H), lymphocyte number (I), monocyte number (J) values for patas monkeys (orange lines) and rhesus monkeys (blue lines) either inoculated with 5,000 PFU of SHFV (solid symbols) or with PBS (open symbols). Shaded regions represent standard range of all pre-exposure values for patas monkeys or previously collected values for rhesus monkeys. Data represent means of each group.



## Figure 2

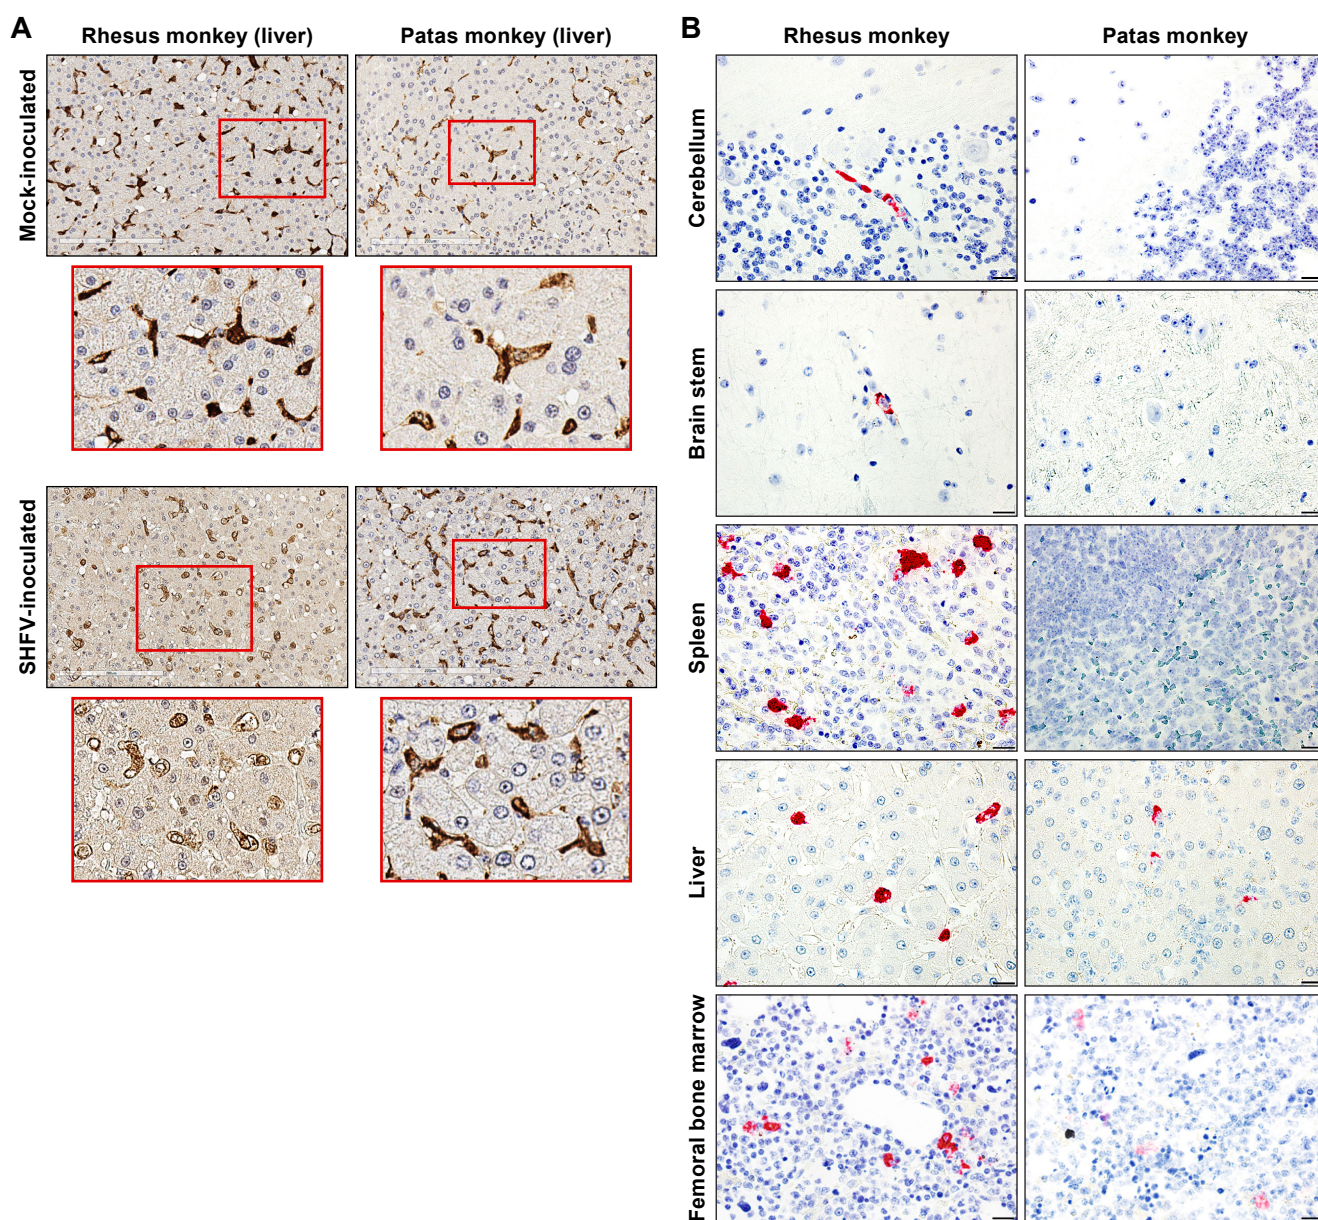

**Figure 2.** Representative images of liver immunohistochemistry for Iba1 in livers of mock- and SHFV-inoculated patas and rhesus monkeys; inset images highlight macrophage morphology for each group (A). Representative images of *in situ* hybridization for SHFV viral RNA in terminal cerebellum, brain stem, spleen, femoral bone marrow and liver samples from patas and rhesus monkeys inoculated with SHFV (B).

### Figure 3

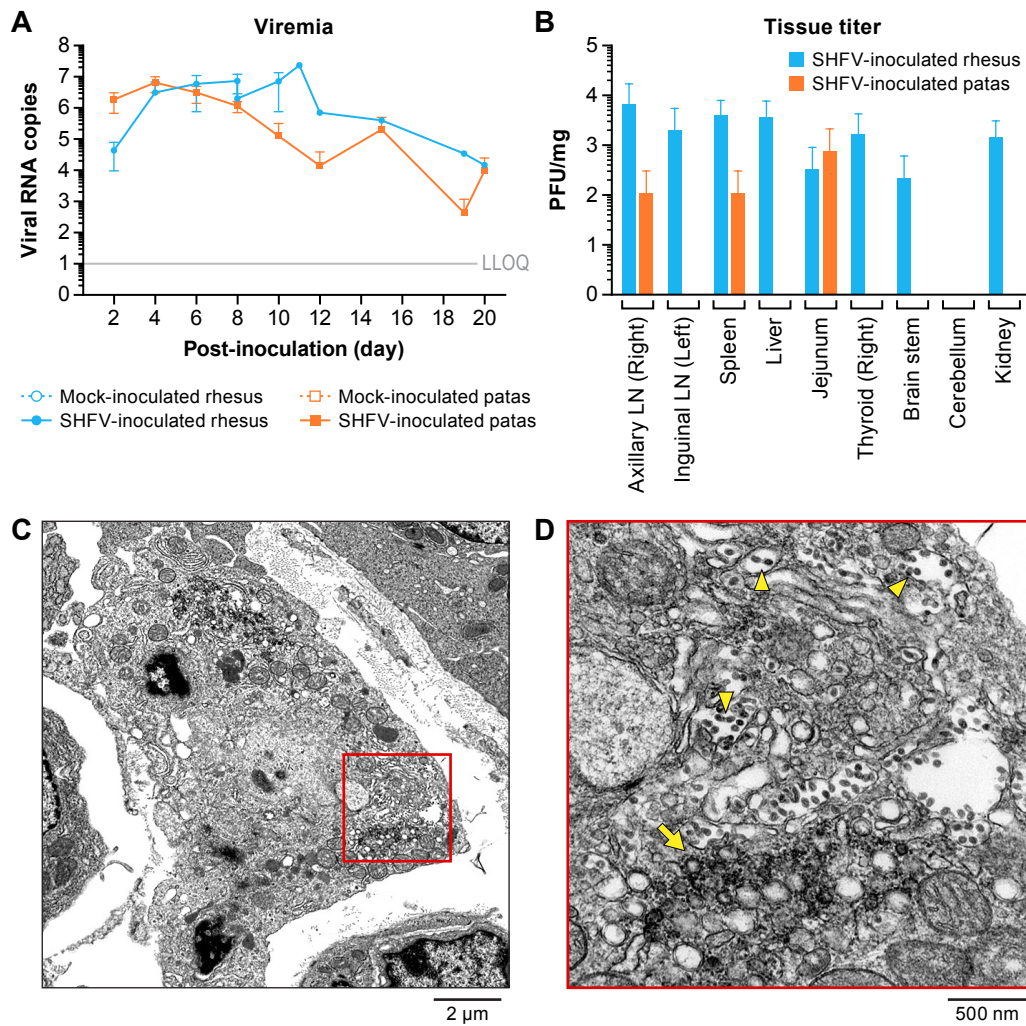

**Figure 3.** Mean viremia values in viral RNA copies per ml of whole blood for mock (open symbols) and SHFV-inoculated (solid symbols) patas (orange) and rhesus (blue) monkeys (A). Mean titer of tissues for SHFV-inoculated patas (orange) and rhesus (blue) monkeys in PFU per mg of 10% tissue homogenate (B, Lymph Node (LN)). Electron micrograph of jejunum from a SHFV-inoculated patas monkey showing double-membrane vesicles and mature virions (C). Electron micrograph of jejunum from a SHFV-inoculated patas monkey showing apparently mature virions (yellow arrowheads) (D).

Figure 4

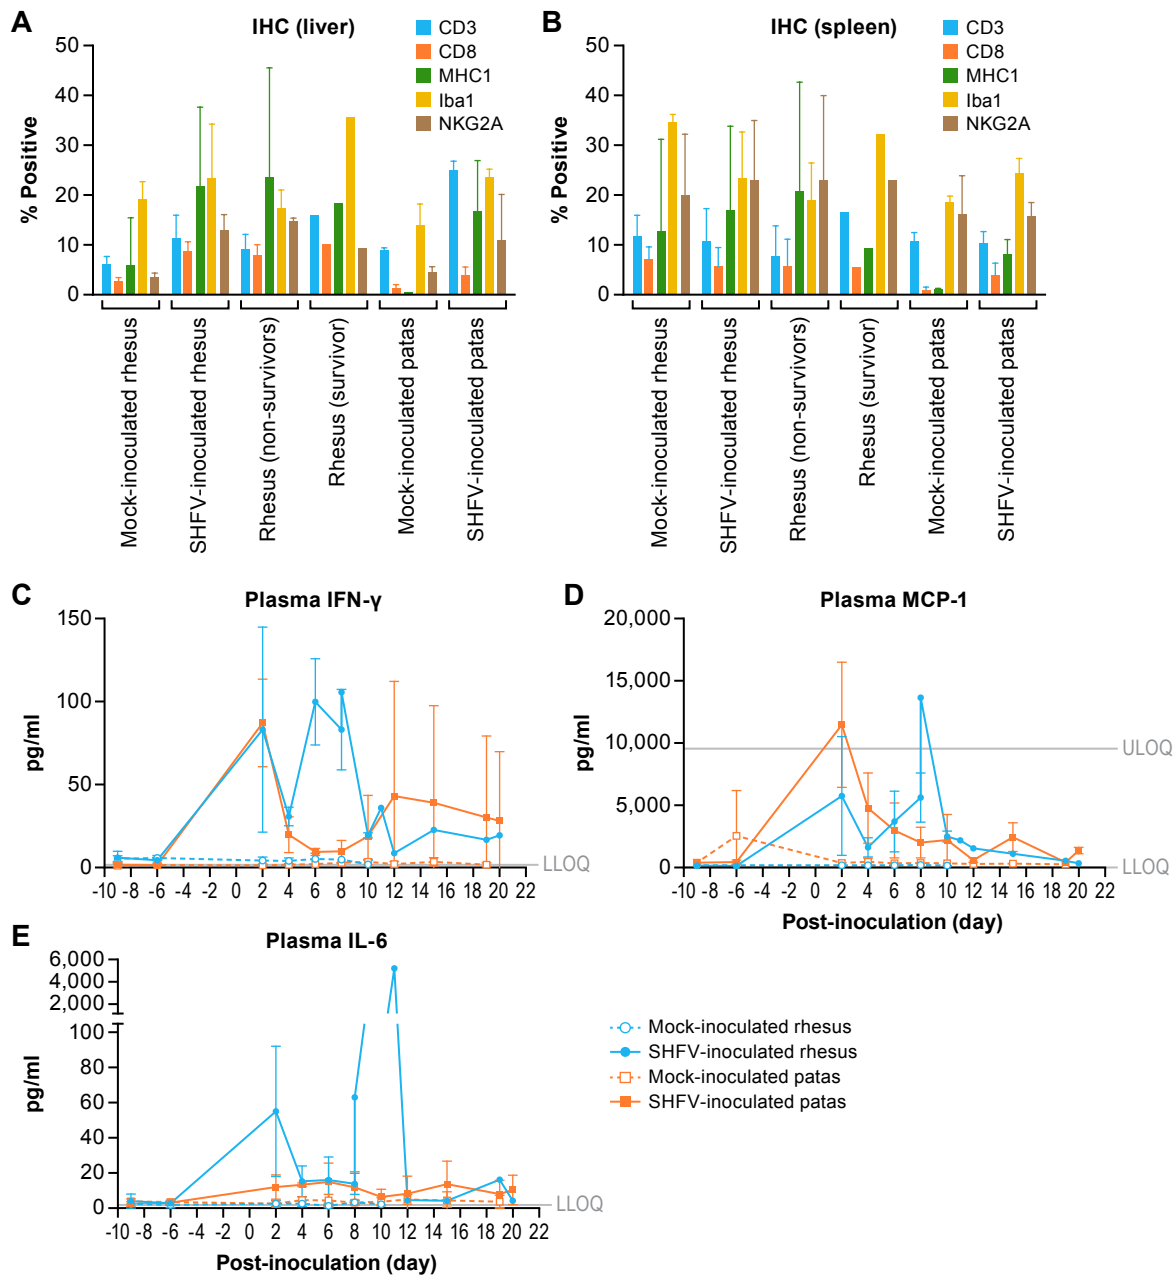

**Figure 4.** Mean quantitative immunohistochemistry values of indicated marker in mock- and SHFV-inoculated patas and rhesus monkey livers and spleens (A, B). Mean plasma concentrations in pg per ml of indicated analyte for mock (open symbols) and SHFV-inoculated (solid symbols) patas (orange) and rhesus (blue) monkeys (C–E). Gray lines represent the lower and upper limits of quantitation (LLOQ and ULOQ, respectively).

Figure 5

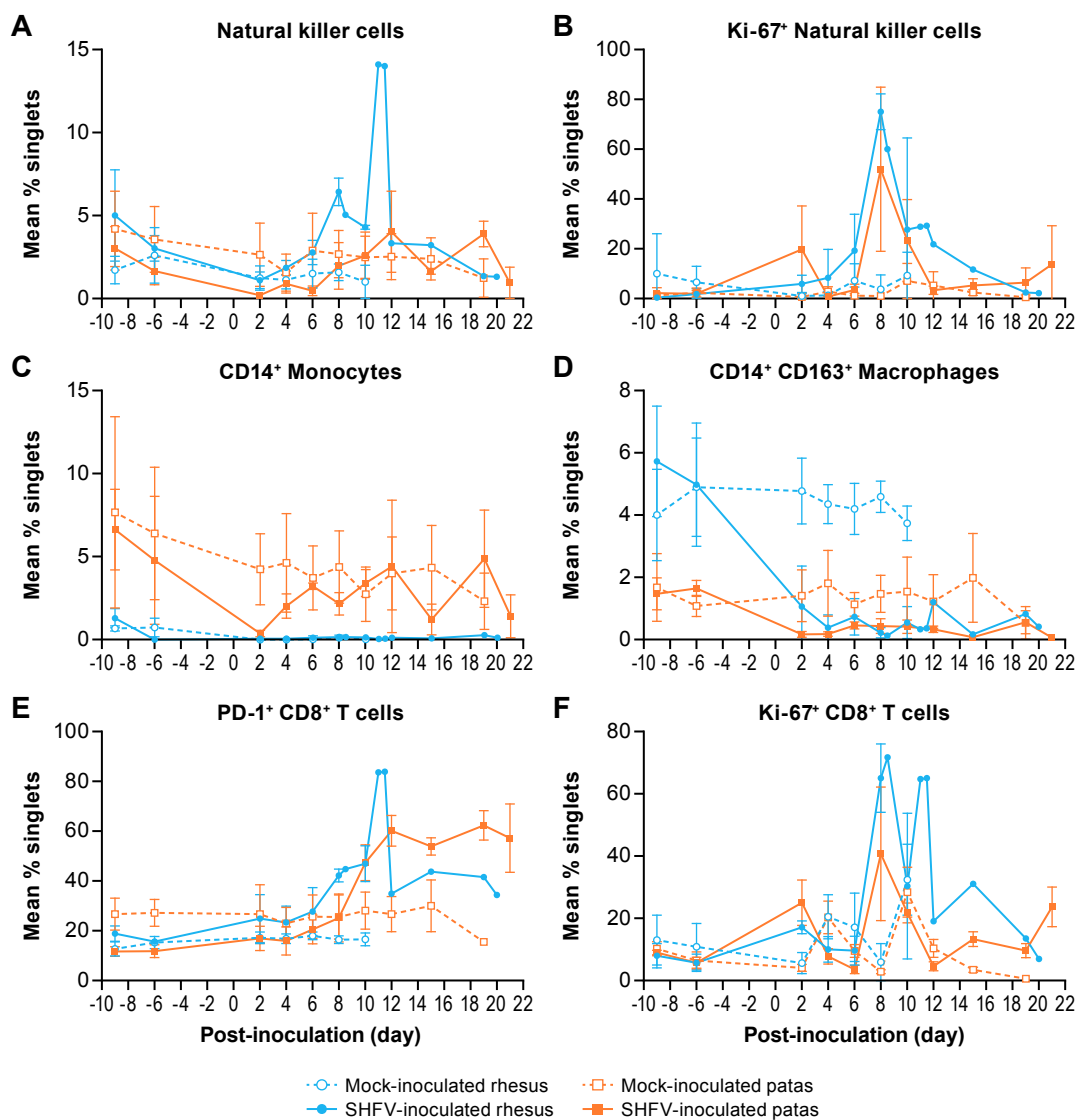

**Figure 5.** Mean percentage of indicated cell populations from whole blood of mock (open symbols) and SHFV-inoculated (solid symbols) patas (orange) and rhesus (blue) monkeys (A-F).

## Figure 6

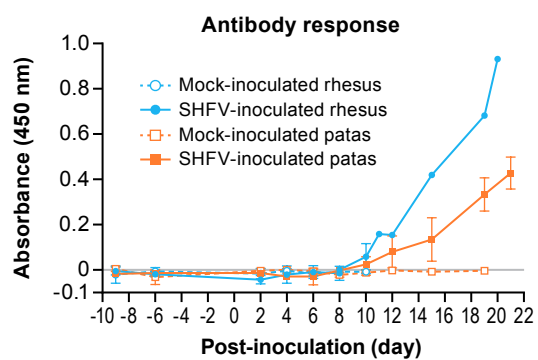

**Figure 6.** Mean ELISA absorbance values for patas (orange lines) and rhesus monkeys (blue lines) either exposed to 5,000 PFU of SHFV (solid symbols) or with PBS (open symbols).
